# Supplementary material for: Cross-Hemispheric Genetic Diversity and Spatial Genetic Structure of Callinectes sapidus Reovirus 1 (CsRV1)
Source: MDPI journal article supplement (doi:10.3390/v15020563), 2023-02-18
Supplement: s1 [file s1]

**Supplementary Figure S1. Pairwise comparisons of CsRV1 concatenated whole genome based on nucleotide sequences (top) and amino acid sequences (bottom).**

|             |    | 1   | 2     | 3     | 4     | 5     | 6     | 7     | 8     | 9     | 10    | 11    | 12    | 13    | 14    | 15    | 16    | 17    | 18    | 19    | 20    | 21    | 22    | 23    |
|-------------|----|-----|-------|-------|-------|-------|-------|-------|-------|-------|-------|-------|-------|-------|-------|-------|-------|-------|-------|-------|-------|-------|-------|-------|
| MD_2008_X45 | 1  |     | 99.08 | 99.32 | 99.44 | 99.26 | 99.26 | 99.20 | 99.30 | 99.11 | 99.29 | 98.64 | 98.53 | 98.66 | 98.46 | 97.77 | 97.87 | 98.56 | 98.50 | 98.42 | 98.44 | 98.44 | 98.36 | 98.48 |
| MD_2020_#1  | 2  | 182 |       | 99.15 | 98.98 | 98.89 | 98.95 | 99.10 | 99.21 | 99.09 | 99.18 | 98.84 | 98.70 | 98.69 | 98.22 | 97.54 | 97.59 | 98.28 | 98.23 | 98.17 | 98.18 | 98.17 | 98.08 | 98.21 |
| MA_2018_#1  | 3  | 134 | 169   |       | 99.31 | 99.00 | 99.24 | 99.34 | 99.47 | 99.32 | 99.44 | 98.68 | 98.51 | 98.63 | 98.30 | 97.69 | 97.73 | 98.41 | 98.38 | 98.31 | 98.35 | 98.36 | 98.24 | 98.35 |
| MA_2018_#2  | 4  | 110 | 202   | 136   |       | 99.15 | 99.29 | 99.16 | 99.28 | 99.10 | 99.25 | 98.58 | 98.50 | 98.59 | 98.38 | 97.72 | 97.83 | 98.47 | 98.41 | 98.35 | 98.35 | 98.36 | 98.26 | 98.39 |
| NY_2020_#1  | 5  | 146 | 219   | 198   | 168   |       | 99.46 | 98.90 | 98.95 | 98.99 | 99.00 | 98.60 | 98.49 | 98.51 | 98.41 | 97.73 | 97.81 | 98.52 | 98.47 | 98.41 | 98.40 | 98.40 | 98.32 | 98.45 |
| NY_2018_#4  | 6  | 146 | 208   | 150   | 141   | 107   |       | 99.05 | 99.12 | 99.14 | 99.14 | 98.65 | 98.56 | 98.58 | 98.46 | 97.79 | 97.89 | 98.56 | 98.51 | 98.45 | 98.44 | 98.45 | 98.35 | 98.48 |
| VA_2018_#1  | 7  | 159 | 179   | 131   | 167   | 217   | 189   |       | 99.27 | 99.21 | 99.40 | 98.55 | 98.37 | 98.48 | 98.19 | 97.53 | 97.60 | 98.28 | 98.23 | 98.16 | 98.17 | 98.17 | 98.08 | 98.18 |
| VA_2018_#2  | 8  | 139 | 156   | 105   | 143   | 208   | 174   | 144   |       | 99.38 | 99.37 | 98.73 | 98.62 | 98.68 | 98.29 | 97.65 | 97.71 | 98.40 | 98.35 | 98.29 | 98.30 | 98.29 | 98.20 | 98.31 |
| DE_2017_#4  | 9  | 177 | 180   | 134   | 178   | 201   | 170   | 157   | 123   |       | 99.38 | 98.63 | 98.51 | 98.59 | 98.23 | 97.63 | 97.64 | 98.34 | 98.29 | 98.25 | 98.26 | 98.24 | 98.13 | 98.25 |
| DE_2017_#2  | 10 | 140 | 162   | 111   | 148   | 198   | 171   | 119   | 125   | 123   |       | 98.72 | 98.50 | 98.64 | 98.30 | 97.65 | 97.70 | 98.38 | 98.33 | 98.27 | 98.30 | 98.28 | 98.17 | 98.28 |
| NC_2019_#3  | 11 | 269 | 229   | 261   | 281   | 277   | 268   | 287   | 251   | 272   | 254   |       | 98.89 | 98.64 | 98.05 | 97.35 | 97.41 | 98.08 | 98.00 | 97.96 | 97.96 | 97.97 | 97.86 | 97.96 |
| FL_2018_#2  | 12 | 292 | 258   | 295   | 298   | 300   | 285   | 323   | 274   | 296   | 298   | 219   |       | 98.59 | 97.99 | 97.34 | 97.32 | 97.99 | 97.94 | 97.87 | 97.87 | 97.77 | 97.77 | 97.90 |
| LA_2019_#1  | 13 | 265 | 260   | 271   | 279   | 296   | 281   | 302   | 261   | 280   | 269   | 269   | 279   |       | 98.23 | 97.52 | 97.56 | 98.29 | 98.23 | 98.19 | 98.21 | 98.17 | 98.09 | 98.20 |
| TX_2017_#2  | 14 | 305 | 353   | 336   | 321   | 314   | 305   | 358   | 339   | 351   | 337   | 387   | 398   | 350   |       | 97.79 | 97.78 | 98.52 | 98.49 | 98.42 | 98.44 | 98.41 | 98.33 | 98.45 |
| FLK_2018_#1 | 15 | 442 | 488   | 458   | 451   | 450   | 438   | 489   | 466   | 470   | 466   | 524   | 527   | 491   | 438   |       | 97.41 | 97.76 | 97.74 | 97.75 | 97.70 | 97.69 | 97.68 | 97.77 |
| T&T_2017_#1 | 16 | 422 | 477   | 450   | 429   | 433   | 418   | 475   | 453   | 467   | 456   | 514   | 530   | 484   | 439   | 514   |       | 97.91 | 97.88 | 97.87 | 97.82 | 97.82 | 97.76 | 97.89 |
| BR_2015_#3  | 17 | 285 | 341   | 314   | 303   | 293   | 286   | 341   | 317   | 328   | 320   | 381   | 399   | 339   | 293   | 443   | 414   |       | 99.67 | 99.49 | 99.47 | 99.36 | 99.33 | 99.44 |
| BR_2015_#4  | 18 | 297 | 351   | 320   | 315   | 303   | 296   | 350   | 327   | 338   | 330   | 396   | 409   | 350   | 300   | 447   | 419   | 65    |       | 99.59 | 99.55 | 99.41 | 99.40 | 99.52 |
| BR_2015_#7  | 19 | 312 | 363   | 334   | 326   | 315   | 307   | 365   | 338   | 347   | 343   | 404   | 422   | 359   | 312   | 445   | 422   | 101   | 82    |       | 99.57 | 99.44 | 99.43 | 99.55 |
| BR_2015_#8  | 20 | 310 | 361   | 327   | 326   | 317   | 309   | 363   | 336   | 345   | 336   | 405   | 421   | 354   | 310   | 456   | 431   | 105   | 90    | 86    |       | 99.37 | 99.34 | 99.45 |
| UY_2019_#1  | 21 | 309 | 362   | 324   | 325   | 317   | 308   | 362   | 338   | 348   | 340   | 402   | 422   | 363   | 314   | 457   | 432   | 126   | 117   | 111   | 124   |       | 99.57 | 99.62 |
| UY_2019_#5  | 22 | 325 | 380   | 348   | 345   | 332   | 326   | 380   | 357   | 370   | 362   | 423   | 442   | 379   | 330   | 460   | 444   | 132   | 119   | 113   | 130   | 86    |       | 99.70 |
| UY_2019_#6  | 23 | 302 | 355   | 327   | 319   | 307   | 301   | 360   | 335   | 346   | 340   | 404   | 416   | 356   | 308   | 442   | 418   | 111   | 96    | 90    | 109   | 76    | 60    |       |

  

|              |    | 1   | 2     | 3     | 4     | 5     | 6     | 7     | 8     | 9     | 10    | 11    | 12    | 13    | 14    | 15    | 16    | 17    | 18    | 19    | 20    | 21    | 22    | 23    |
|--------------|----|-----|-------|-------|-------|-------|-------|-------|-------|-------|-------|-------|-------|-------|-------|-------|-------|-------|-------|-------|-------|-------|-------|-------|
| MD_2008_#X45 | 1  |     | 99.06 | 99.44 | 99.56 | 99.38 | 99.32 | 99.43 | 99.35 | 99.11 | 99.41 | 98.67 | 98.37 | 98.26 | 97.75 | 97.35 | 97.57 | 98.05 | 97.96 | 97.87 | 97.88 | 98.05 | 97.90 | 97.97 |
| MD_2020_#1   | 2  | 62  |       | 99.15 | 98.96 | 98.87 | 98.87 | 99.18 | 99.18 | 99.02 | 99.21 | 99.06 | 98.75 | 98.38 | 97.57 | 97.07 | 97.28 | 97.76 | 97.67 | 97.64 | 97.66 | 97.76 | 97.61 | 97.72 |
| MA_2018_#1   | 3  | 37  | 56    |       | 99.38 | 99.08 | 99.18 | 99.53 | 99.56 | 99.30 | 99.55 | 98.70 | 98.40 | 98.23 | 97.67 | 97.32 | 97.44 | 97.99 | 97.93 | 97.84 | 97.88 | 97.99 | 97.84 | 97.91 |
| MA_2018_#2   | 4  | 29  | 69    | 41    |       | 99.29 | 99.35 | 99.38 | 99.27 | 99.02 | 99.40 | 98.61 | 98.34 | 98.14 | 97.67 | 97.31 | 97.54 | 97.99 | 97.87 | 97.81 | 97.79 | 97.96 | 97.81 | 97.91 |
| NY_2020_#1   | 5  | 41  | 75    | 61    | 47    |       | 99.65 | 99.06 | 98.97 | 98.88 | 99.08 | 98.62 | 98.37 | 98.05 | 97.76 | 97.38 | 97.54 | 98.05 | 97.96 | 97.90 | 97.88 | 98.02 | 97.87 | 97.97 |
| NY_2018_#4   | 6  | 45  | 75    | 54    | 43    | 23    |       | 99.08 | 99.03 | 98.94 | 99.08 | 98.61 | 98.40 | 98.08 | 97.79 | 97.44 | 97.61 | 98.11 | 98.02 | 97.96 | 97.94 | 98.08 | 97.93 | 98.03 |
| VA_2018_#1   | 7  | 38  | 54    | 31    | 41    | 62    | 61    |       | 99.43 | 99.27 | 99.59 | 98.68 | 98.38 | 98.17 | 97.61 | 97.26 | 97.40 | 97.91 | 97.84 | 97.75 | 97.76 | 97.90 | 97.75 | 97.82 |
| VA_2018_#2   | 8  | 43  | 54    | 29    | 48    | 68    | 64    | 38    |       | 99.47 | 99.41 | 98.73 | 98.52 | 98.35 | 97.61 | 97.26 | 97.41 | 97.94 | 97.85 | 97.76 | 97.81 | 97.91 | 97.76 | 97.84 |
| DE_2017_#4   | 9  | 59  | 65    | 46    | 65    | 74    | 70    | 48    | 35    |       | 99.38 | 98.53 | 98.35 | 98.16 | 97.44 | 97.11 | 97.22 | 97.78 | 97.69 | 97.63 | 97.64 | 97.72 | 97.57 | 97.67 |
| DE_2017_#2   | 10 | 39  | 52    | 30    | 40    | 61    | 61    | 27    | 39    | 41    |       | 98.75 | 98.38 | 98.29 | 97.63 | 97.25 | 97.41 | 97.94 | 97.85 | 97.76 | 97.81 | 97.91 | 97.76 | 97.84 |
| NC_2019_#3   | 11 | 88  | 62    | 86    | 92    | 91    | 92    | 87    | 84    | 97    | 83    |       | 99.12 | 98.50 | 97.57 | 97.04 | 97.16 | 97.63 | 97.52 | 97.46 | 97.51 | 97.67 | 97.49 | 97.57 |
| FL_2018_#2   | 12 | 108 | 83    | 106   | 110   | 108   | 106   | 107   | 98    | 109   | 107   | 58    |       | 98.37 | 97.37 | 96.89 | 97.01 | 97.35 | 97.31 | 97.16 | 97.20 | 97.31 | 97.19 | 97.29 |
| LA_2019_#1   | 13 | 115 | 107   | 117   | 123   | 129   | 127   | 121   | 109   | 122   | 113   | 99    | 108   |       | 97.35 | 96.79 | 96.87 | 97.44 | 97.37 | 97.34 | 97.35 | 97.49 | 97.32 | 97.41 |
| TX_2017_#2   | 14 | 149 | 161   | 154   | 154   | 148   | 146   | 158   | 158   | 169   | 157   | 161   | 174   | 175   |       | 97.13 | 97.16 | 97.79 | 97.72 | 97.63 | 97.69 | 97.78 | 97.57 | 97.70 |
| FLK_2018_#1  | 15 | 175 | 194   | 177   | 178   | 173   | 169   | 181   | 181   | 191   | 182   | 196   | 206   | 212   | 190   |       | 97.11 | 97.34 | 97.23 | 97.20 | 97.20 | 97.37 | 97.26 | 97.35 |
| T&T_2017_#1  | 16 | 161 | 180   | 169   | 163   | 163   | 158   | 172   | 171   | 184   | 171   | 188   | 198   | 207   | 188   | 191   |       | 97.51 | 97.41 | 97.37 | 97.37 | 97.48 | 97.29 | 97.43 |
| BR_2015_#3   | 17 | 129 | 148   | 133   | 133   | 129   | 125   | 138   | 136   | 147   | 136   | 157   | 175   | 169   | 146   | 176   | 165   |       | 99.59 | 99.36 | 99.41 | 99.40 | 99.24 | 99.35 |
| BR_2015_#4   | 18 | 135 | 154   | 137   | 141   | 135   | 131   | 143   | 142   | 153   | 142   | 164   | 178   | 174   | 151   | 183   | 171   | 27    |       | 99.56 | 99.49 | 99.44 | 99.32 | 99.43 |
| BR_2015_#7   | 19 | 141 | 156   | 143   | 145   | 139   | 135   | 149   | 148   | 157   | 148   | 168   | 188   | 176   | 157   | 185   | 174   | 42    | 29    |       | 99.53 | 99.52 | 99.40 | 99.50 |
| BR_2015_#8   | 20 | 140 | 155   | 140   | 146   | 140   | 136   | 148   | 145   | 156   | 145   | 165   | 185   | 175   | 153   | 185   | 174   | 39    | 34    | 31    |       | 99.40 | 99.27 | 99.38 |
| UY_2019_#1   | 21 | 129 | 148   | 133   | 135   | 131   | 127   | 139   | 138   | 151   | 138   | 154   | 178   | 166   | 147   | 174   | 167   | 40    | 37    | 32    | 40    |       | 99.58 | 99.65 |
| UY_2019_#5   | 22 | 139 | 158   | 143   | 145   | 141   | 137   | 149   | 148   | 161   | 148   | 166   | 186   | 177   | 161   | 181   | 179   | 50    | 45    | 40    | 48    | 28    |       | 99.65 |
| UY_2019_#6   | 23 | 134 | 151   | 138   | 138   | 134   | 130   | 144   | 143   | 154   | 143   | 161   | 179   | 171   | 152   | 175   | 170   | 43    | 38    | 33    | 41    | 23    | 23    |       |

**Supplementary Figure S2. Maximum Likelihood phylogenetic tree based on amino acid sequences of the concatenated genomes(A) and segment 9 (B) of CsRV1 isolates from different geographic locations. Bootstrap > 50% was shown on the tree. SsRV WX\_2012 was used as the outgroup.**

A

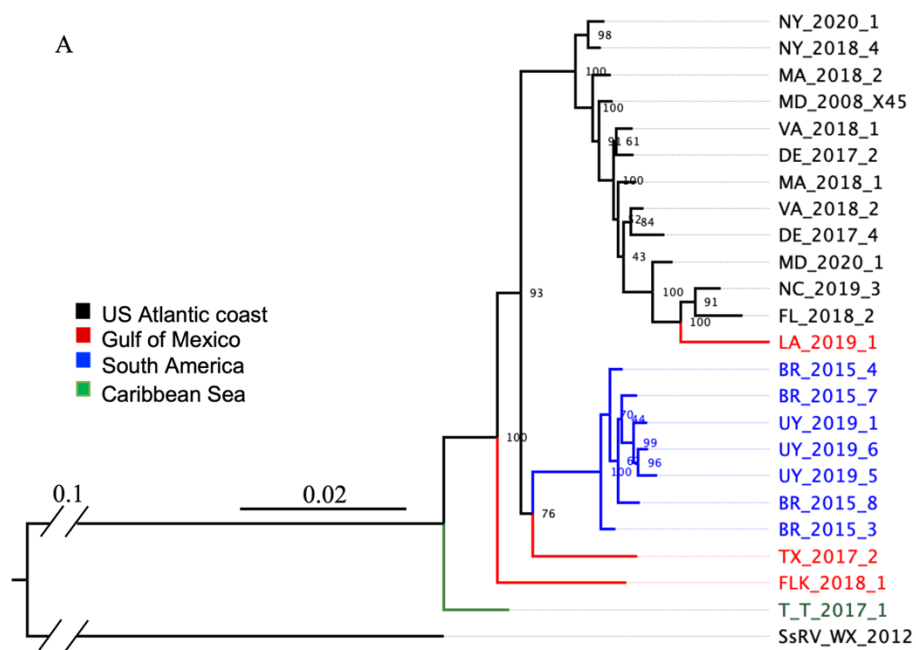

B

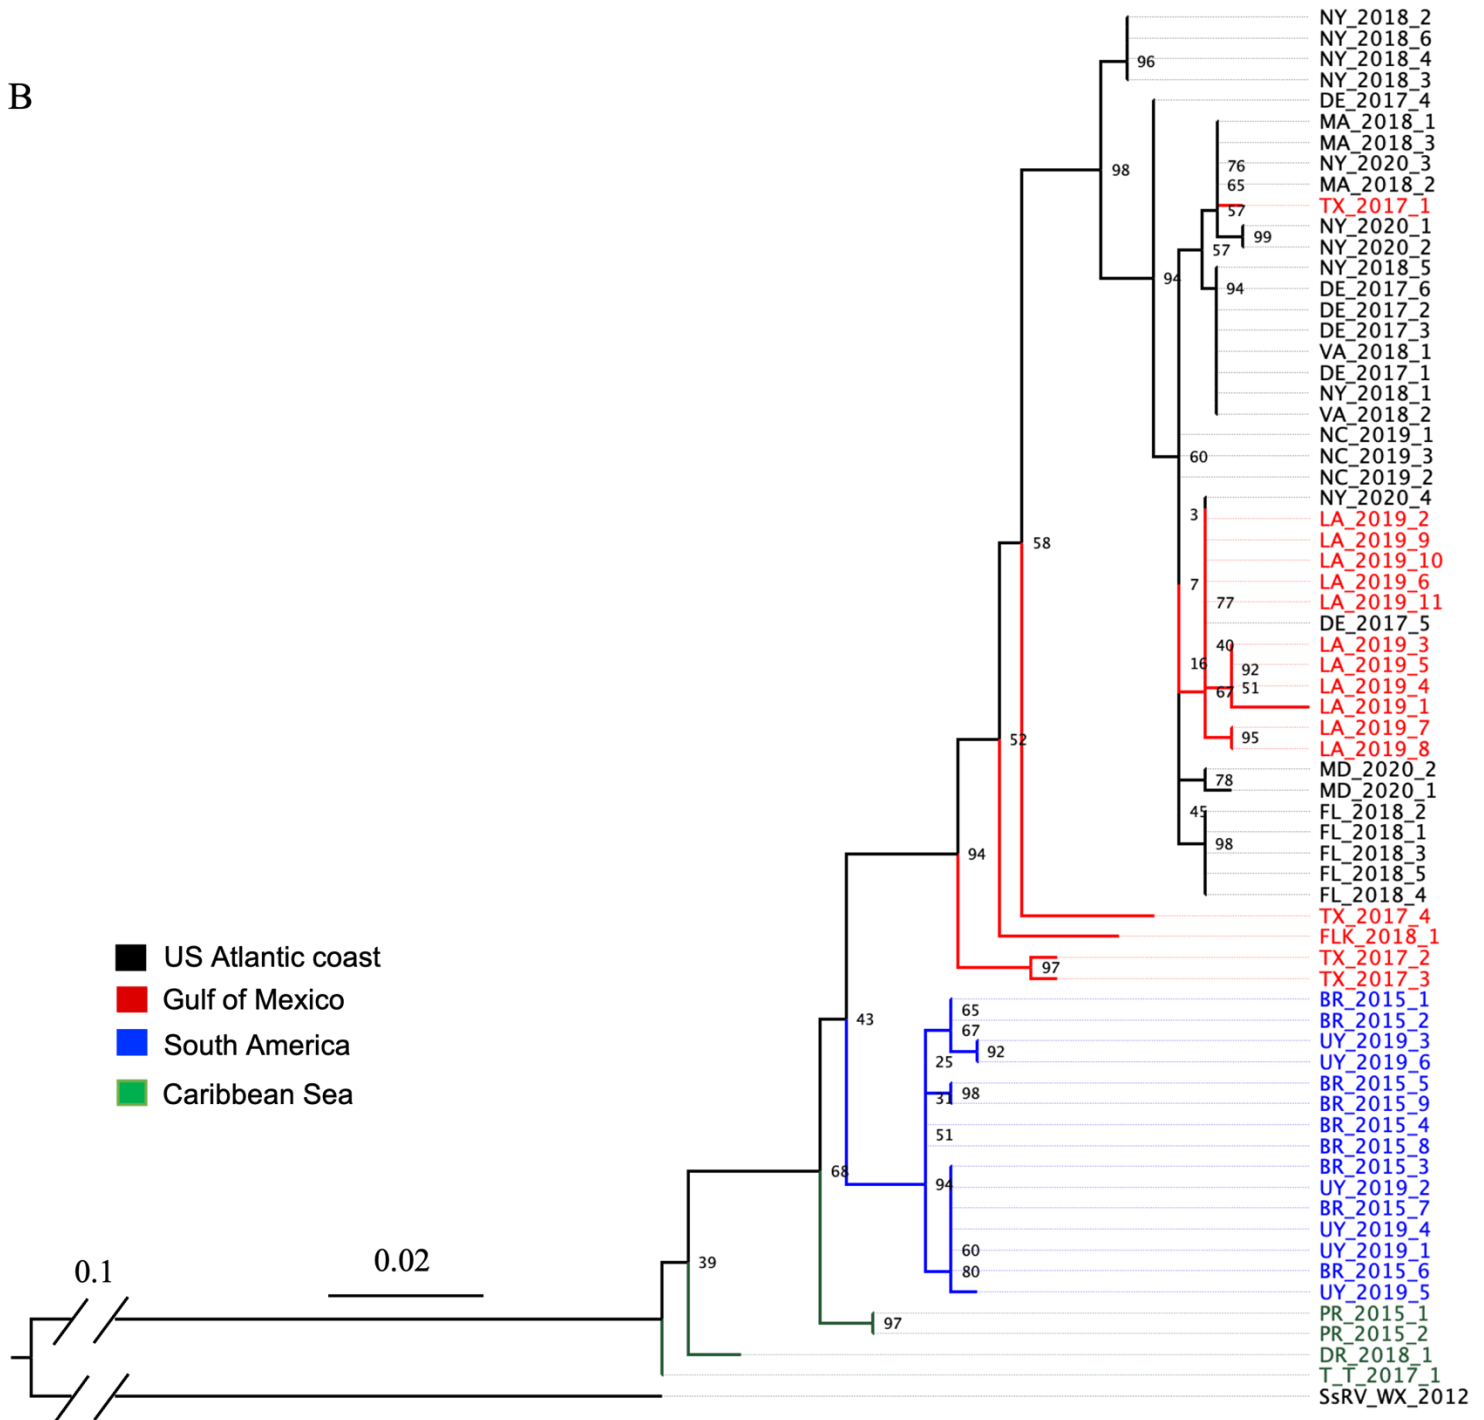

**Supplementary Figure S3. Maximum likelihood phylogenetic tree based on the nucleotide sequences of each segment of 23 strains of CsRV1 collected from different geographic locations.** Best Models based on BIC for each tree were shown in Supplementary Table 3.

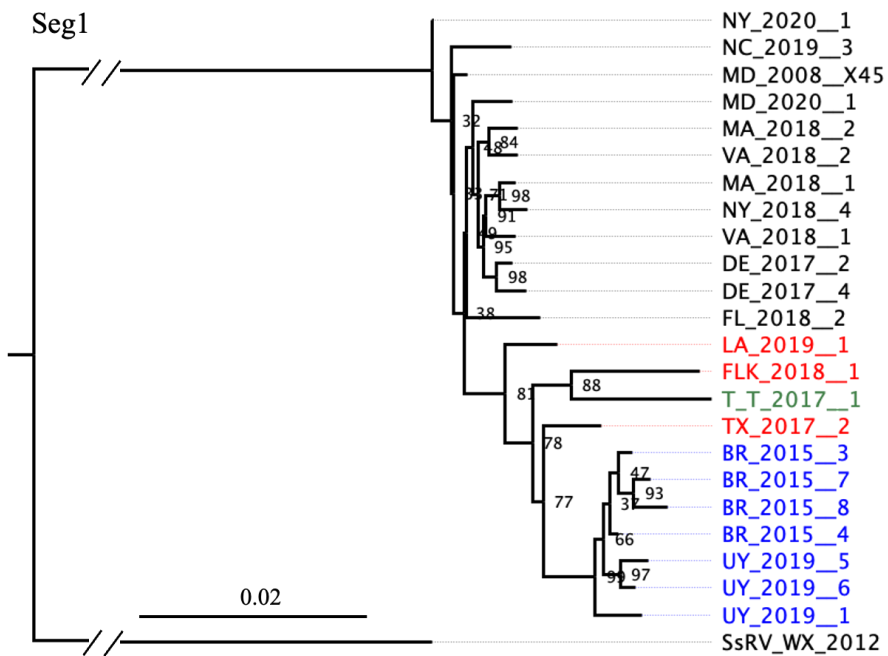

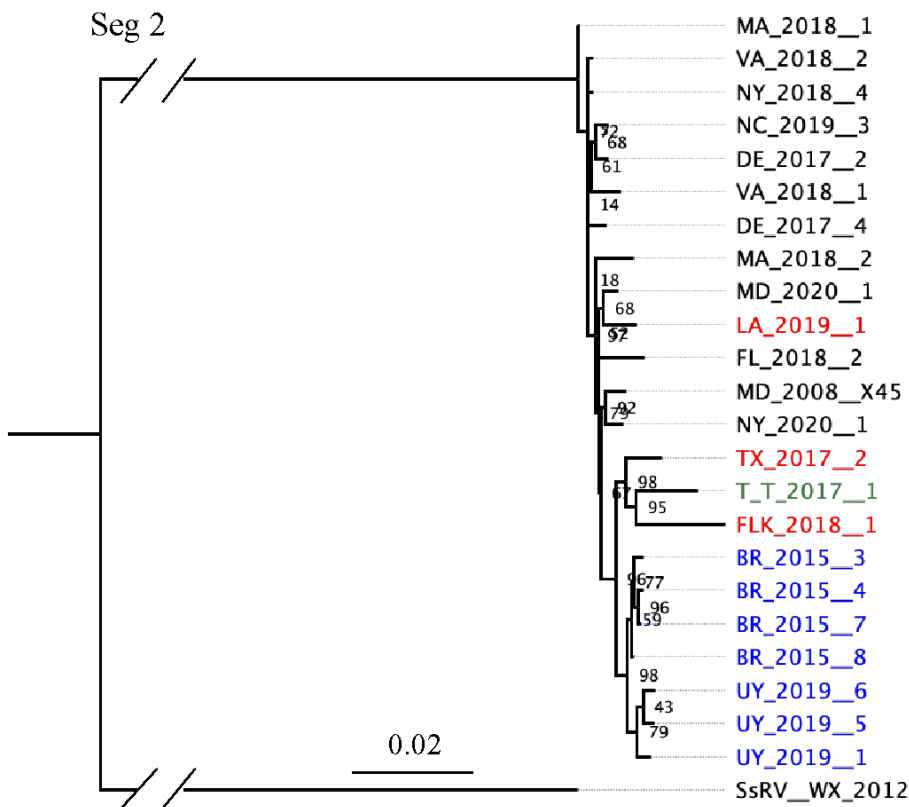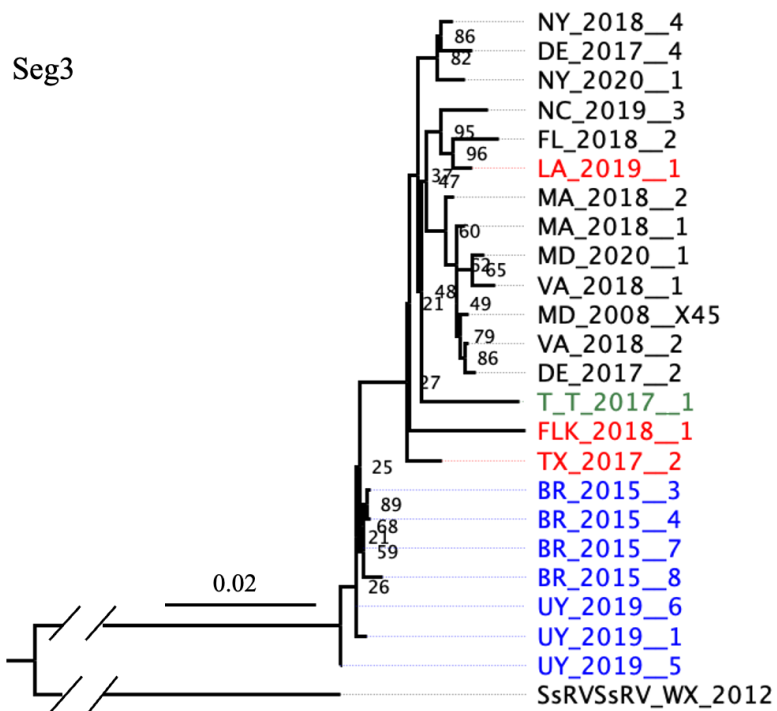

Seg4

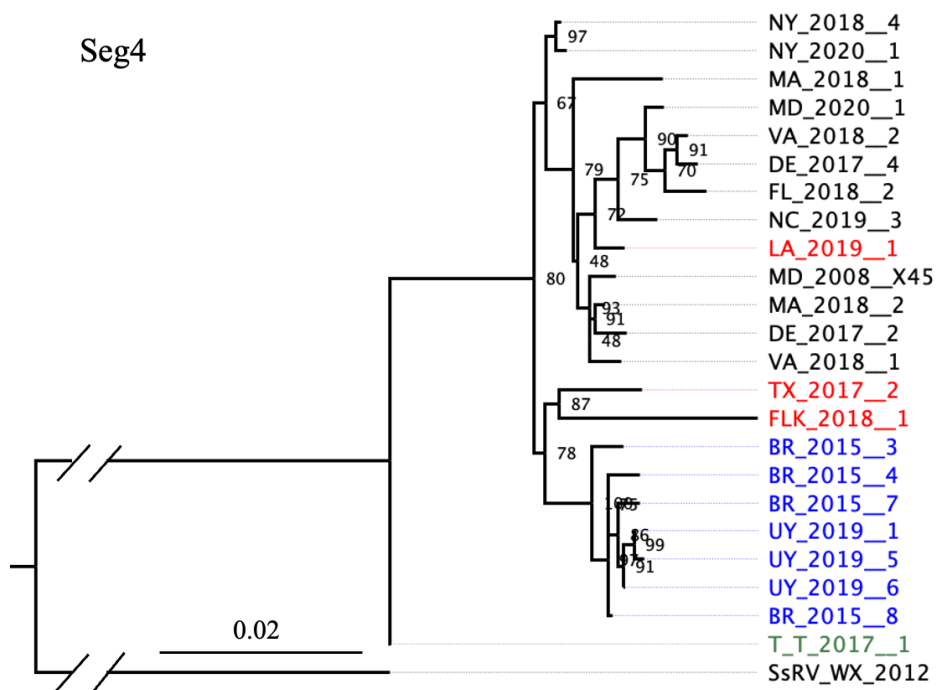

Seg5

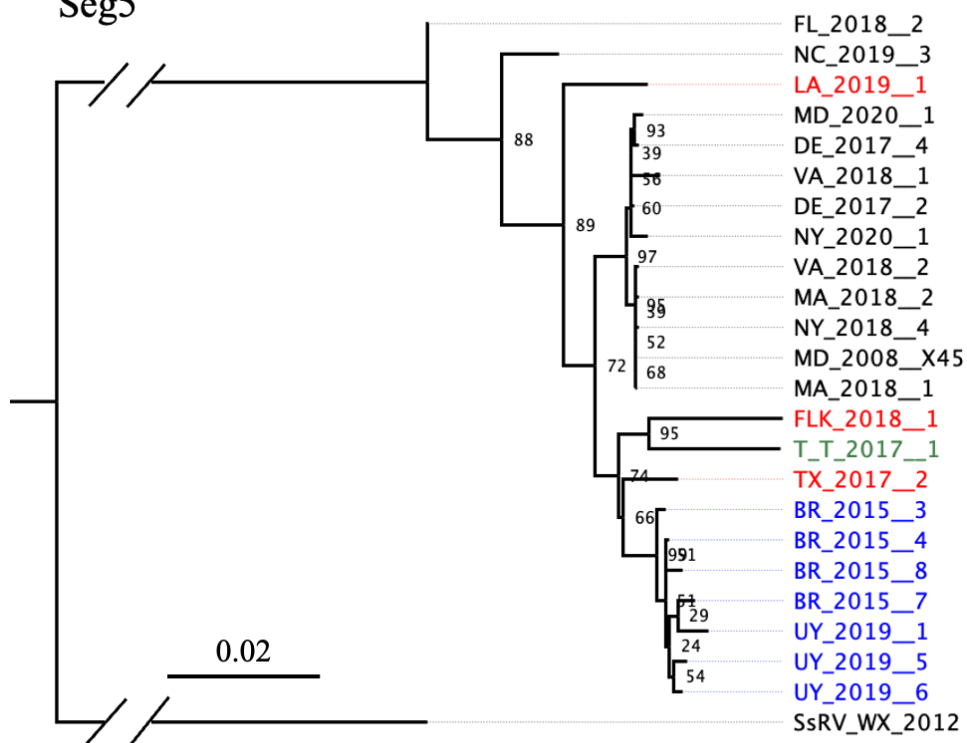

Seg6

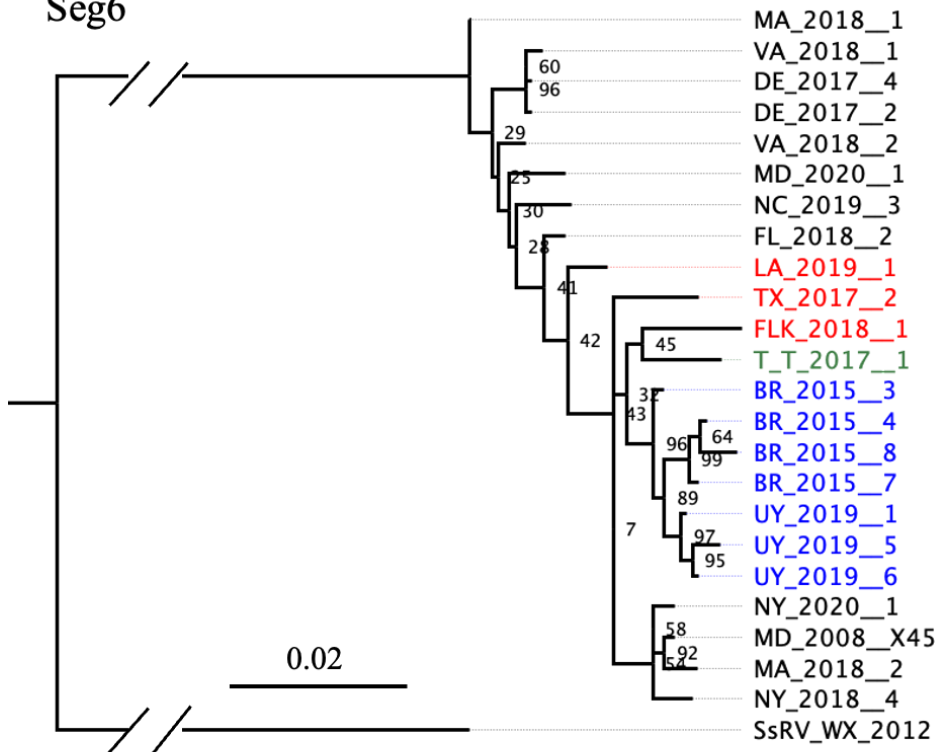

Seg7

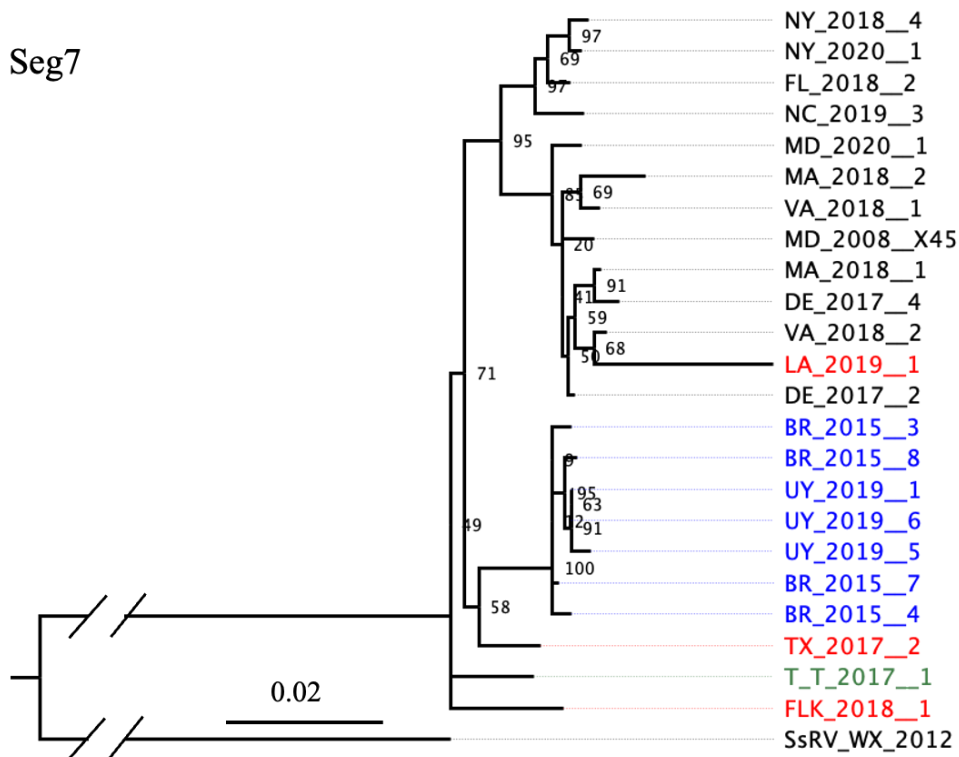



Seg8

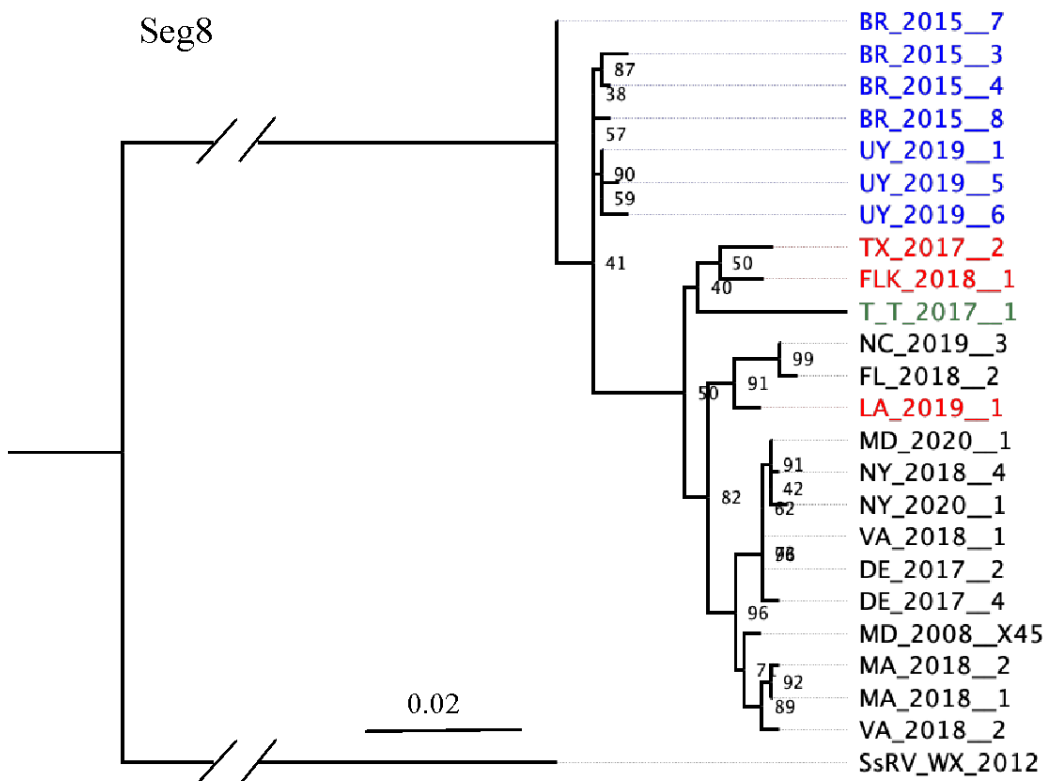

Seg9

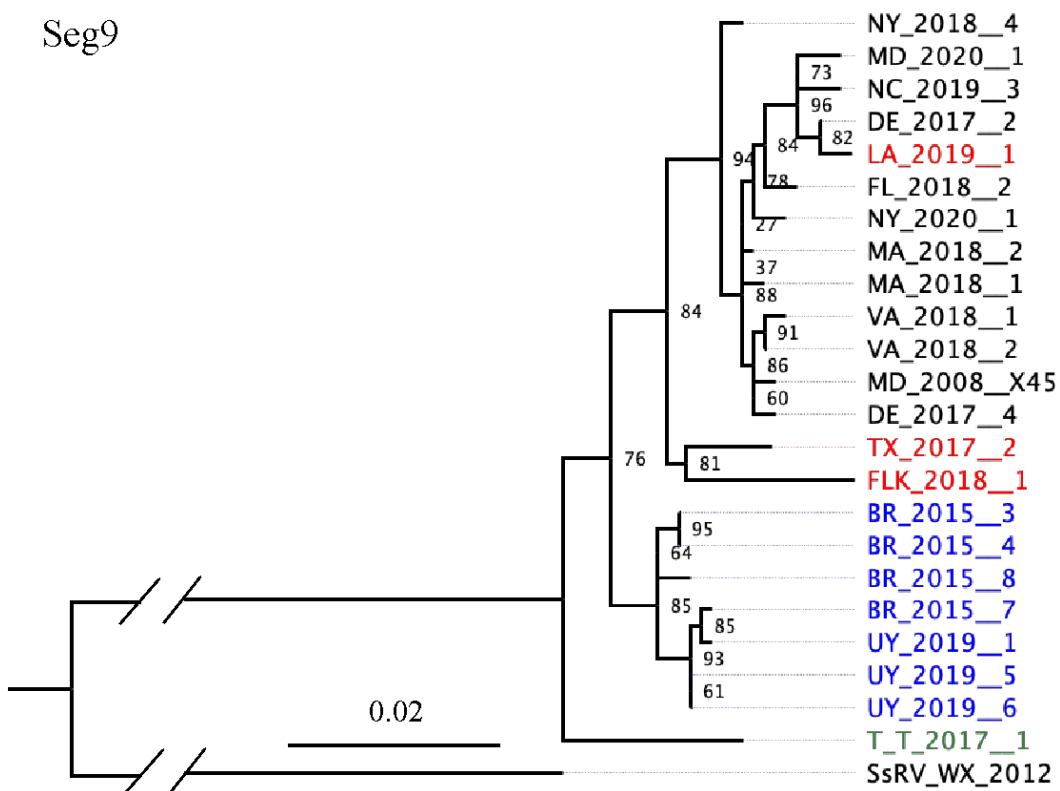



Seg10

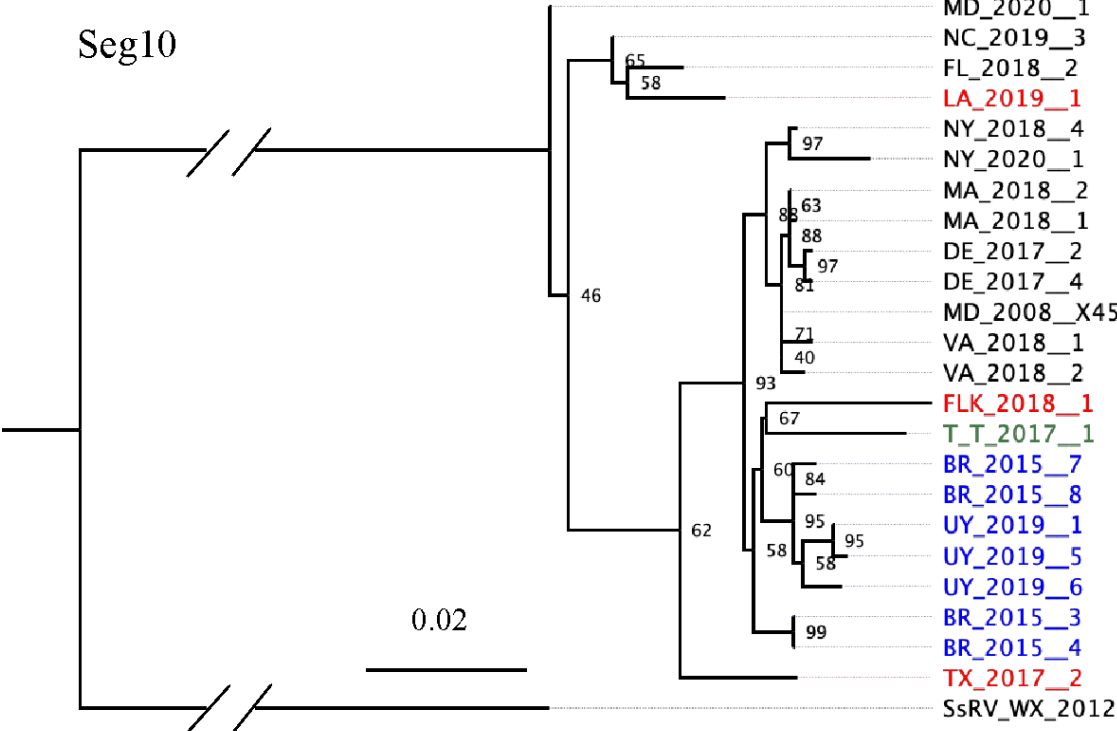

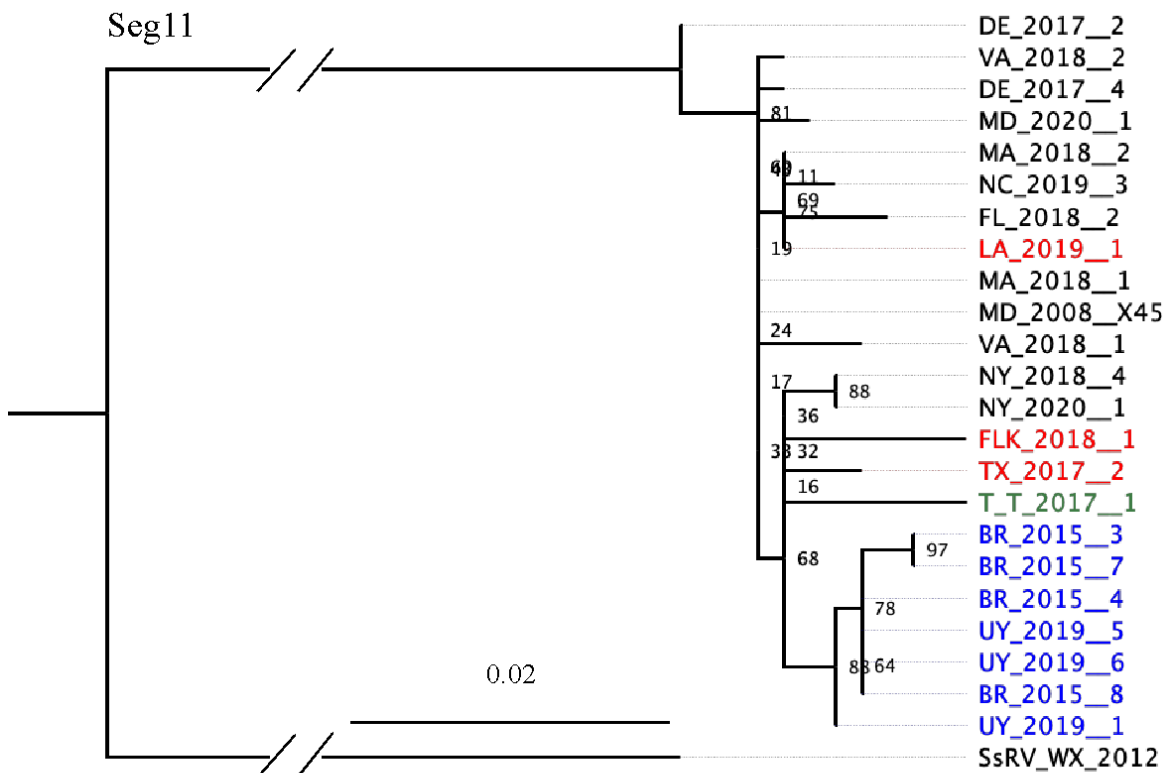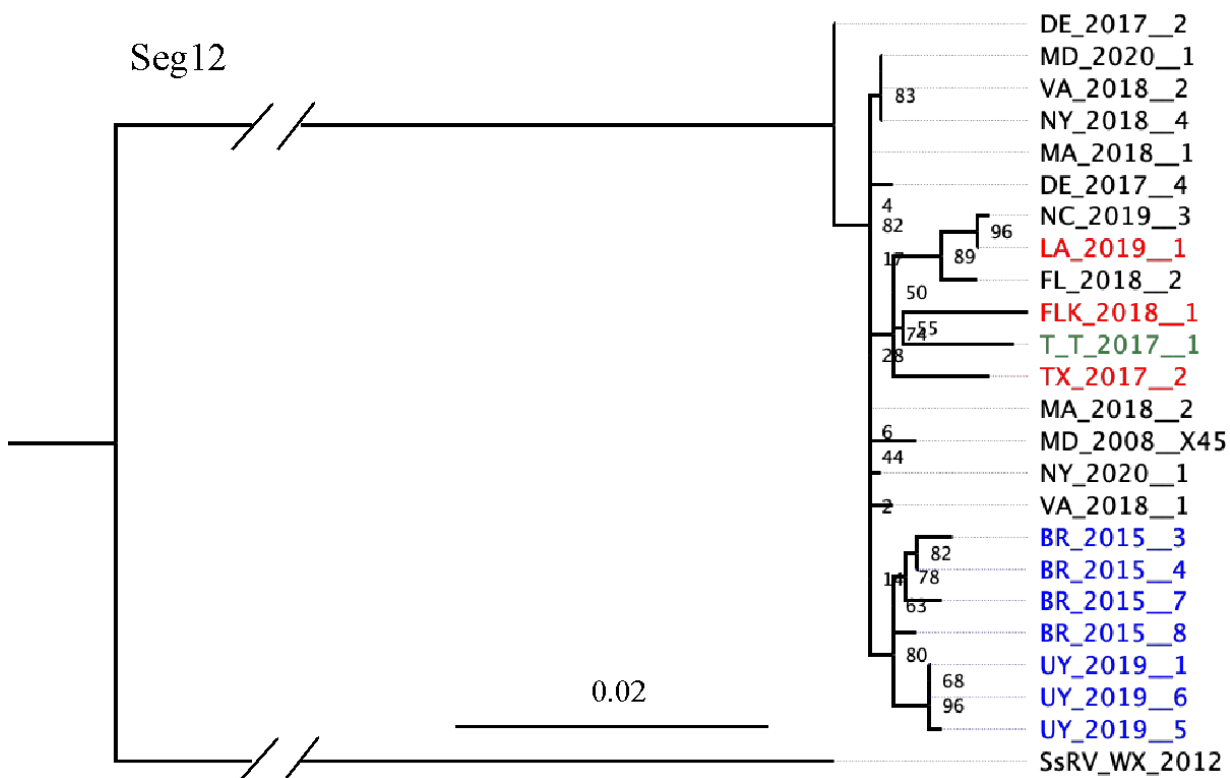

**Supplementary Table S1. Primers used in this study.**  
(See attached excel)

**Supplementary Table S2.  $F_{ST}$  estimates of CsRV1 between collection years based on seg9.** Bold values indicate significance ( $P < 0.05$ ).

|         | NY11-13     | NY18-21     | MD06-09 | MD10-12 | MD18-20 |
|---------|-------------|-------------|---------|---------|---------|
| NY11-13 | -           |             |         |         |         |
| NY18-21 | <b>0.75</b> | -           |         |         |         |
| MD06-09 | <b>0.31</b> | <b>0.51</b> | -       |         |         |
| MD10-12 | <b>0.47</b> | <b>0.59</b> | 0.03    | -       |         |
| MD18-20 | <b>0.40</b> | <b>0.54</b> | -0.08   | 0.17    | -       |

**Supplementary Table S3.  $F_{ST}$  estimates of CsRV1 between locations.** Bold values indicate significance ( $P < 0.05$ ).

|     | MA          | NY          | VA          | DE          | MD          | NC          | LA          | FL          | TX          | CAR         | BR   | UY |
|-----|-------------|-------------|-------------|-------------|-------------|-------------|-------------|-------------|-------------|-------------|------|----|
| MA  | -           |             |             |             |             |             |             |             |             |             |      |    |
| NY  | 0.06        | -           |             |             |             |             |             |             |             |             |      |    |
| VA  | 0.48        | 0.21        | -           |             |             |             |             |             |             |             |      |    |
| DE  | 0.15        | 0.12        | 0.12        | -           |             |             |             |             |             |             |      |    |
| MD  | <b>0.32</b> | <b>0.31</b> | <b>0.35</b> | 0.17        | -           |             |             |             |             |             |      |    |
| NC  | 0.76        | <b>0.47</b> | 0.86        | 0.31        | 0.23        | -           |             |             |             |             |      |    |
| LA  | <b>0.67</b> | <b>0.52</b> | <b>0.73</b> | <b>0.43</b> | <b>0.34</b> | 0.45        | -           |             |             |             |      |    |
| FL  | 0.88        | <b>0.57</b> | <b>0.95</b> | <b>0.62</b> | <b>0.53</b> | <b>0.96</b> | <b>0.79</b> | -           |             |             |      |    |
| TX  | 0.24        | <b>0.42</b> | 0.19        | <b>0.32</b> | <b>0.5</b>  | <b>0.39</b> | <b>0.59</b> | 0.52        | -           |             |      |    |
| CAR | 0.55        | <b>0.68</b> | 0.52        | <b>0.59</b> | <b>0.7</b>  | <b>0.65</b> | <b>0.77</b> | <b>0.74</b> | <b>0.3</b>  | -           |      |    |
| BR  | <b>0.77</b> | <b>0.72</b> | <b>0.78</b> | <b>0.73</b> | <b>0.74</b> | <b>0.83</b> | <b>0.84</b> | <b>0.87</b> | <b>0.46</b> | <b>0.53</b> | -    |    |
| UY  | <b>0.91</b> | <b>0.76</b> | <b>0.93</b> | <b>0.8</b>  | <b>0.78</b> | <b>0.95</b> | <b>0.9</b>  | <b>0.97</b> | <b>0.5</b>  | <b>0.6</b>  | 0.17 | -  |
