# Supplementary material for: Cross-Hemispheric Genetic Diversity and Spatial Genetic Structure of Callinectes sapidus Reovirus 1 (CsRV1)
Source: Viruses. 2023 Feb 18;15(2):563. doi: 10.3390/v15020563 (PMC9962310; doi:10.3390/v15020563)
Supplement: Supplementary file 1 [file viruses-15-00563-s001.zip › viruses-2130485-Table S1.csv]

Primer Name	Sequence	Pool	Length	Tm	GC%	Start	End
MingliZhao_1_LEFT	TACACTGGATGCGCATAATGGC	1	22	61.39	50	11	33
MingliZhao_1_RIGHT	TGTCACACTCTGGATGGAGTCC	1	22	61.41	54.55	490	468
MingliZhao_2_LEFT	TGTGGATAGAAACTGGATGGAAGC	2	24	60.63	45.83	357	381
MingliZhao_2_RIGHT	CATGGGATGAATGCAATCGGGA	2	22	61.08	50	802	780
MingliZhao_3_LEFT	TGATGCGAAACAGACTGGACAG	1	22	60.87	50	669	691
MingliZhao_3_RIGHT	GGGATTGGCAAAGACCTTCTCG	1	22	61.52	54.55	1108	1086
MingliZhao_4_LEFT	TCGACTTATATGGAGACGATAGCATGA	2	27	61.28	40.74	983	1010
MingliZhao_4_RIGHT	TTTCAACAACTCGTAGTGCGCA	2	22	61.31	45.45	1409	1387
MingliZhao_5_LEFT	ACTCTAAGTATGGTGTGGATGCCA	1	24	61.37	45.83	1286	1310
MingliZhao_5_RIGHT	AGATTCTACCTGCGTGTTCATTCG	1	24	61.21	45.83	1739	1715
MingliZhao_6_LEFT	GCCTCTAGTATTAAAAGGCGATGAGC	2	26	61.77	46.15	1608	1634
MingliZhao_6_RIGHT	GGCAGTGTCTTTCGCAGATGAT	2	22	61.25	50	2032	2010
MingliZhao_7_LEFT	TTCACTGGAACTGAACGCCTAC	1	22	60.55	50	1900	1922
MingliZhao_7_RIGHT	TGCCCTGACCATACTTGTTGGA	1	22	61.63	50	2375	2353
MingliZhao_8_LEFT	GCCGTGTATCCTACTAAACAGCC	2	23	61.04	52.17	2254	2277
MingliZhao_8_RIGHT	TGAGTTCCAGTCCAGGGTACAC	2	22	61.35	54.55	2706	2684
MingliZhao_9_LEFT	TGAGCGTATGAATCCAGCAGAC	1	22	60.48	50	2568	2590
MingliZhao_9_RIGHT	TTCCTTTCCTAGCGTTGATGGC	1	22	60.94	50	2975	2953
MingliZhao_10_LEFT	TCATGACGTATGATGAGCCACC	2	22	60.22	50	2855	2877
MingliZhao_10_RIGHT	GGTGCCCATGGTATGAAGCAAT	2	22	61.28	50	3320	3298
MingliZhao_11_LEFT	TGCTACCAGTGGACCTAACGAC	1	22	61.72	54.55	3185	3207
MingliZhao_11_RIGHT	ATCCGATTTTCAGCCGTTCGAG	1	22	61.31	50	3659	3637
MingliZhao_12_LEFT	TATATTGGCGTCTGCAGCGATG	2	22	61.18	50	3528	3550
MingliZhao_12_RIGHT	GTTCCAAAGAGACAACAGCAGCT	2	23	61.55	47.83	3971	3948
MingliZhao_13_LEFT	ACACTTTGATATCGAATTCGTCTACAGA	1	28	60.63	35.71	3837	3865
MingliZhao_13_RIGHT	GTGAGAAGCTCAGAGAGTTGCG	1	22	61.24	54.55	4260	4238
MingliZhao_14_LEFT	TGCTTATGTTTGGACTGATGGGG	2	23	60.88	47.83	4139	4162
MingliZhao_14_RIGHT	GCGAGCATTGGTGAGGTTGTTA	2	22	61.45	50	4557	4535
MingliZhao_15_LEFT	GTAGAAGACGGGGGATTCTTCCT	1	23	61.2	52.17	4433	4456
MingliZhao_15_RIGHT	TTCGAGCCAATCCCAGTACCTT	1	22	61.42	50	4864	4842
MingliZhao_16_LEFT	TGTTGGAGAGCAGATCAGACTGA	2	23	61.07	47.83	4742	4765
MingliZhao_16_RIGHT	AGGGATCTGACGGTCAACACAA	2	22	61.61	50	5169	5147
MingliZhao_17_LEFT	AACCCGAGATACTTCACGCTCA	1	22	61.46	50	5041	5063
MingliZhao_17_RIGHT	ATCCAACCGACACATCTCGTCT	1	22	61.47	50	5513	5491
MingliZhao_18_LEFT	TCTGTCATGTAAAACTCAGACCAGAA	2	26	60.18	38.46	5389	5415
MingliZhao_18_RIGHT	TCGTACCAAAGGTCTCACCCTG	2	22	61.67	54.55	5830	5808
MingliZhao_19_LEFT	TGGTAGCATTGTTCAGTCTGTCAA	1	24	60.44	41.67	5695	5719
MingliZhao_19_RIGHT	TCCTCTCCAGCCAATACCAACA	1	22	61.1	50	6162	6140
MingliZhao_20_LEFT	GAGATGGTGAAAGCCGTGTCAA	2	22	61.13	50	6024	6046
MingliZhao_20_RIGHT	AGTACGTCTCAAGCTGCTCTCT	2	22	60.88	50	6493	6471
MingliZhao_21_LEFT	CATTCTTGCTACGTACGCTGCA	1	22	61.55	50	6368	6390
MingliZhao_21_RIGHT	TTGTATGACGATGCGCTGCAAT	1	22	61.57	45.45	6816	6794
MingliZhao_22_LEFT	CTGGATTGGCGATCGATGAGAG	2	22	60.93	54.55	6687	6709
MingliZhao_22_RIGHT	GATGTGATGTTCAGTCCTCGCG	2	22	61.61	54.55	7144	7122
MingliZhao_23_LEFT	GGTCCTTACATTCTCTGTAGTTGATCA	1	27	60.36	40.74	6988	7015
MingliZhao_23_RIGHT	AGGTGAAATTCGTGGGTGATGC	1	22	61.46	50	7439	7417
MingliZhao_24_LEFT	GTGTACACCCAACAGCTCGAAG	2	22	61.43	54.55	7309	7331
MingliZhao_24_RIGHT	CTGTTGAAATCCCGAGCCTACG	2	22	61.31	54.55	7735	7713
MingliZhao_25_LEFT	TGCCCGTTATCCAGGATTCCAT	1	22	61.56	50	7613	7635
MingliZhao_25_RIGHT	TCAGTGTTCATGCCGTTGATGG	1	22	61.45	50	8085	8063
MingliZhao_26_LEFT	TCTTGACGGCGTAGGATTCACT	2	22	61.46	50	7965	7987
MingliZhao_26_RIGHT	GTAGTAGAAGCTCGGGGCAGTT	2	22	61.79	54.55	8409	8387
MingliZhao_27_LEFT	TTCGACCGAAGATTCCTACGCT	1	22	61.52	50	8283	8305
MingliZhao_27_RIGHT	GGGTACGCTCCAGTAAGTCCAT	1	22	61.54	54.55	8754	8732
MingliZhao_28_LEFT	GGCTGACATGTTCTCTACCTTGC	2	23	61.48	52.17	8616	8639
MingliZhao_28_RIGHT	ACCCTGACCATCACTAGCGATC	2	22	61.6	54.55	9037	9015
MingliZhao_29_LEFT	ATCGATCCTTGAGATGGAGGGC	1	22	61.68	54.55	8916	8938
MingliZhao_29_RIGHT	GACTATGTGACTGGTTGCAGGC	1	22	61.51	54.55	9358	9336
MingliZhao_30_LEFT	ATGAGGTTGGAACTGCAATTGGA	2	23	60.75	43.48	9235	9258
MingliZhao_30_RIGHT	TGATCGATAGGAAGTGAAGCCAC	2	23	60.18	47.83	9640	9617
MingliZhao_31_LEFT	TGCACGATCTTGTCAAATCCCG	1	22	61.5	50	9518	9540
MingliZhao_31_RIGHT	TAAACAACCGATCCACAGCACG	1	22	61.44	50	9984	9962
MingliZhao_32_LEFT	CCGAACTCTAAGGTGGACTGGT	2	22	61.41	54.55	9854	9876
MingliZhao_32_RIGHT	AGCTTCTTAAGAGGGGGAATGGA	2	23	60.83	47.83	10285	10262
MingliZhao_33_LEFT	CCAATGTATTGCTAAGAGTGGATAGGA	1	27	60.47	40.74	10146	10173
MingliZhao_33_RIGHT	TGTCGCAATGTAATGCACCTCC	1	22	61.51	50	10602	10580
MingliZhao_34_LEFT	ACTACCATGTCTTTCCCCCTGT	2	22	60.77	50	10479	10501
MingliZhao_34_RIGHT	GGCTAATCTACGCATGTGTTTGC	2	23	60.79	47.83	10952	10929
MingliZhao_35_LEFT	TGATCGTAATGCTGATGCGGTG	1	22	61.37	50	10813	10835
MingliZhao_35_RIGHT	TACATATGCGCTGCAACTGGTG	1	22	61.57	50	11218	11196
MingliZhao_36_LEFT	TCTTTACTGTCTACTACTTCCTTCACACA	2	29	61.5	37.93	11090	11119
MingliZhao_36_RIGHT	GCTTCTCCGTCTTCGCTTGATC	2	22	61.61	54.55	11535	11513
MingliZhao_37_LEFT	CGCTATCTCGAATGATAAGCCGC	1	23	61.81	52.17	11410	11433
MingliZhao_37_RIGHT	TCCTTCAGGTTCTGGAGTGTTCC	1	23	61.83	52.17	11815	11792
MingliZhao_38_LEFT	ACTTGTTGTACTATCCGTTGAGTGT	2	25	60.22	40	11691	11716
MingliZhao_38_RIGHT	GCGCCAGCAGTAATTCAGTTCA	2	22	61.76	50	12156	12134
MingliZhao_39_LEFT	TGGAGGGAGAGTTCTACACAATTAGT	1	26	60.98	42.31	12018	12044
MingliZhao_39_RIGHT	ACTAAGCTCACCTTCCGTCTCA	1	22	60.82	50	12479	12457
MingliZhao_40_LEFT	AACTCGCGACGAAGCTAGATCA	2	22	61.82	50	12342	12364
MingliZhao_40_RIGHT	CCGTATCAGTTGCGACCGTAAC	2	22	61.6	54.55	12792	12770
MingliZhao_41_LEFT	CCACTGCACAGATCGCTGAAAA	1	22	61.7	50	12666	12688
MingliZhao_41_RIGHT	GAAGCCGCAATATCCCTTGTGT	1	22	61.26	50	13128	13106
MingliZhao_42_LEFT	AGAGGCATCGCATGAACTTGTG	2	22	61.51	50	12999	13021
MingliZhao_42_RIGHT	CTTCGCCTCAAGATGTGAAGCA	2	22	61.19	50	13472	13450
MingliZhao_43_LEFT	GATCGTCGCTATCATGTTGGGC	1	22	61.74	54.55	13339	13361
MingliZhao_43_RIGHT	TCATGGATCCAGCCGTCTTCAT	1	22	61.55	50	13809	13787
MingliZhao_44_LEFT	TACGTGTGCCTCATGGTCCTTT	2	22	61.94	50	13677	13699
MingliZhao_44_RIGHT	CTCTACTAGTGCCGCGATCACT	2	22	61.64	54.55	14143	14121
MingliZhao_45_LEFT	TGGCGTTGTCAGCGATTAATCC	1	22	61.57	50	14014	14036
MingliZhao_45_RIGHT	TCTCAGCAACCTCATCTGTCGT	1	22	61.4	50	14464	14442
MingliZhao_46_LEFT	ATTTCTCTGCAGGTCGATTGCC	2	22	61.26	50	14328	14350
MingliZhao_46_RIGHT	GATGATAAGGCATCAGACCGGC	2	22	61.19	54.55	14743	14721
MingliZhao_47_LEFT	TGCGAAAAGTGACAGATGGATTATGT	1	26	61.3	38.46	14605	14631
MingliZhao_47_RIGHT	TTGTCCTGCTGAATACCCCCTT	1	22	61.37	50	15041	15019
MingliZhao_48_LEFT	ACAAGTAAGTGTGATTGGCCTCAC	2	24	61.28	45.83	14919	14943
MingliZhao_48_RIGHT	ATGTAATCCCTCGCAGCCTCAT	2	22	61.62	50	15386	15364
MingliZhao_49_LEFT	TGCAGGATGGATTGAGATGCTC	1	22	60.49	50	15263	15285
MingliZhao_49_RIGHT	AGTGCAAACAAACAAGCCCATTG	1	23	61.24	43.48	15726	15703
MingliZhao_50_LEFT	GCCGAGCTTGGAATGGTACCTA	2	22	62.12	54.55	15591	15613
MingliZhao_50_RIGHT	TAAGTCCTGCTGTCATGCCTGG	2	22	62.32	54.55	15998	15976
MingliZhao_51_LEFT	TAGTATCCGAGGCCCTCAAGGT	1	22	62.11	54.55	15872	15894
MingliZhao_51_RIGHT	CTTCAAGCGGCAGATCATACGG	1	22	61.68	54.55	16278	16256
MingliZhao_52_LEFT	TGTGTGTCCTATGTTTCTTTCTCCTT	2	26	60.41	38.46	16128	16154
MingliZhao_52_RIGHT	ACGCTGCAACTGATCCATTCTG	2	22	61.51	50	16615	16593
MingliZhao_53_LEFT	GGGAAGTGTTAAAGGCAGTAGATGG	1	25	61.38	48	16478	16503
MingliZhao_53_RIGHT	TTACAACCATAACGCCACTCGC	1	22	61.5	50	16913	16891
MingliZhao_54_LEFT	AGGCAATGGTCAGAGTGGTGAT	2	22	61.69	50	16775	16797
MingliZhao_54_RIGHT	CTCTTGGTGCTTGGACAAAGGT	2	22	61.01	50	17204	17182
MingliZhao_55_LEFT	GGGTCAAGTCTGCTCCTTTTGG	1	22	61.4	54.55	17072	17094
MingliZhao_55_RIGHT	AGTTAACAAACTCAGCCGCTGC	1	22	61.95	50	17531	17509
MingliZhao_56_LEFT	CGCTGTTCTGATTGATGTAGATTCTTC	2	27	60.52	40.74	17373	17400
MingliZhao_56_RIGHT	CCACGATTCAGAAAGGCTTCCC	2	22	61.52	54.55	17843	17821
MingliZhao_57_LEFT	CGGAGTATCACGTAGGCATGGA	1	22	61.65	54.55	17708	17730
MingliZhao_57_RIGHT	ATGTGTGCAATCTGCTGATGCA	1	22	61.46	45.45	18179	18157
MingliZhao_58_LEFT	AGGATCAGTTAGTCTACCCGCT	2	22	60.09	50	18056	18078
MingliZhao_58_RIGHT	TCCTTAACGACGACGGACATGA	2	22	61.45	50	18521	18499
MingliZhao_59_LEFT	AGGAGGCTCTGAGCTACTACGA	1	22	61.81	54.55	18388	18410
MingliZhao_59_RIGHT	GTCAGCTTCCACAGGATTGTCG	1	22	61.5	54.55	18858	18836
MingliZhao_60_LEFT	CGTGCCATTAGAGCTGAAGTCG	2	22	61.61	54.55	18732	18754
MingliZhao_60_RIGHT	ACTCATCCACCATCTCTAGCCG	2	22	61.34	54.55	19140	19118
MingliZhao_61_LEFT	ACTTCCTTTTTGTTTGACTTTTCCCA	1	26	60.24	34.62	18925	18951
MingliZhao_61_RIGHT	TCACCTGAGACATTCCTCCCAC	1	22	61.42	54.55	19333	19311
MingliZhao_62_LEFT	ACACTGATTGCGTTACGAAGAGT	2	23	60.55	43.48	19198	19221
MingliZhao_62_RIGHT	TCCATCAAAATGACTCTGCGCC	2	22	61.52	50	19614	19592
MingliZhao_63_LEFT	AGATGTCTCGCTCCTTGTCAGC	1	22	62.35	54.55	19486	19508
MingliZhao_63_RIGHT	TAGCAACGTACCATGTGCCATC	1	22	61	50	19945	19923
MingliZhao_64_LEFT	AGACACCGTGCTACCAATGAGT	2	22	61.67	50	19820	19842
MingliZhao_64_RIGHT	TAGGCGCGCTTCTTGGTTAATG	2	22	61.57	50	20228	20206
MingliZhao_65_LEFT	TCCTGTAGTTATGGTTCCAAGTAGTGT	1	27	61.41	40.74	20090	20117
MingliZhao_65_RIGHT	CGAAAGGTGTCCAGATCGCATC	1	22	61.62	54.55	20562	20540
MingliZhao_66_LEFT	ATGGCAGACAGCGTCTCTGATC	2	22	62.42	54.55	20426	20448
MingliZhao_66_RIGHT	CACATTGGTGCACCTCAGTCAA	2	22	61.33	50	20871	20849
MingliZhao_67_LEFT	GCGGAATCATTAATTGGCTGCA	1	22	60.22	45.45	20733	20755
MingliZhao_67_RIGHT	CAGCCGTGGTCTGATCCAAATC	1	22	61.57	54.55	21183	21161
MingliZhao_68_LEFT	AGTGTTAGCACCGTATCTAACCGA	2	24	61.4	45.83	21046	21070
MingliZhao_68_RIGHT	AGCCTTCAACCATTGGGGAATG	2	22	61.15	50	21452	21430
MingliZhao_69_LEFT	CAACAGTGGGTACATGATGCAGA	1	23	60.87	47.83	21326	21349
MingliZhao_69_RIGHT	AGCTGGTTCACCACAGGGATTA	1	22	61.36	50	21736	21714
MingliZhao_70_LEFT	CCTGCTAAGTGTGACTGTTACGA	2	23	60.31	47.83	21578	21601
MingliZhao_70_RIGHT	GTTCTTCACCGCAACAGGGTAG	2	22	61.44	54.55	21992	21970
MingliZhao_71_LEFT	GCAAATTCAGACCCAATTGATCGC	1	24	61.49	45.83	21865	21889
MingliZhao_71_RIGHT	CGATCCACTTCAACCTTGTCGC	1	22	62.06	54.55	22271	22249
MingliZhao_72_LEFT	TTCAAAGAACGCGGATCTGTCC	2	22	61.19	50	22149	22171
MingliZhao_72_RIGHT	ATCCGACAAACCCAGCAAACAA	2	22	61.27	45.45	22605	22583
MingliZhao_73_LEFT	TGATTTCTCTTTGAAAAGCTTTGGTGG	1	27	61.11	37.04	22480	22507
MingliZhao_73_RIGHT	AGTGCAGACAAAACCACAACAGA	1	23	61.12	43.48	22893	22870
MingliZhao_74_LEFT	AGAGTGAAAGCAGTGATCAACGA	2	23	60.24	43.48	22755	22778
MingliZhao_74_RIGHT	AAGATCCCTTCTCTTACGCCGG	2	22	61.86	54.55	23174	23152
MingliZhao_75_LEFT	AAGTTGCTCACCTCTCGCAAAC	1	22	61.64	50	23040	23062
MingliZhao_75_RIGHT	GCTGTCCTCCAATAGCGTTCAC	1	22	61.56	54.55	23464	23442
MingliZhao_76_LEFT	GGGACACCGAGTTGACATAATTTTC	2	25	60.39	44	23306	23331
MingliZhao_76_RIGHT	GCGCTGGTAAGTCTTTCCATCA	2	22	60.94	50	23765	23743
Seg80-F123	ACGAATGACCTTGGAGAAGAC		21	57.68	47.62	seg8: 123	seg8: 144
Seg8-R930	TTTCGGGACGACGTGGAATG		20	60.67	55	seg8: 930	seg8: 950
Seg9-78	AAGAGCCAAACTGGAAGTCG		20	59.47	50	seg9: 78	seg9: 98
Seg9-1038	GGCTGGCAGCTACAGGATAA		20	60.37	55	seg9: 1038	seg9: 1058
